# Supplementary material
Source: bioRxiv or medRxiv preprint supplement (https://medrxiv.org/highwire/filestream/80823/field_highwire_adjunct_files/4/2020.05.10.20097451-5.pdf)
Supplement: Supplementary file [file 2020.05.10.20097451-5.pdf]

Supplemental Figure 3 Summary of critical appraisal items for prevalence estimates.

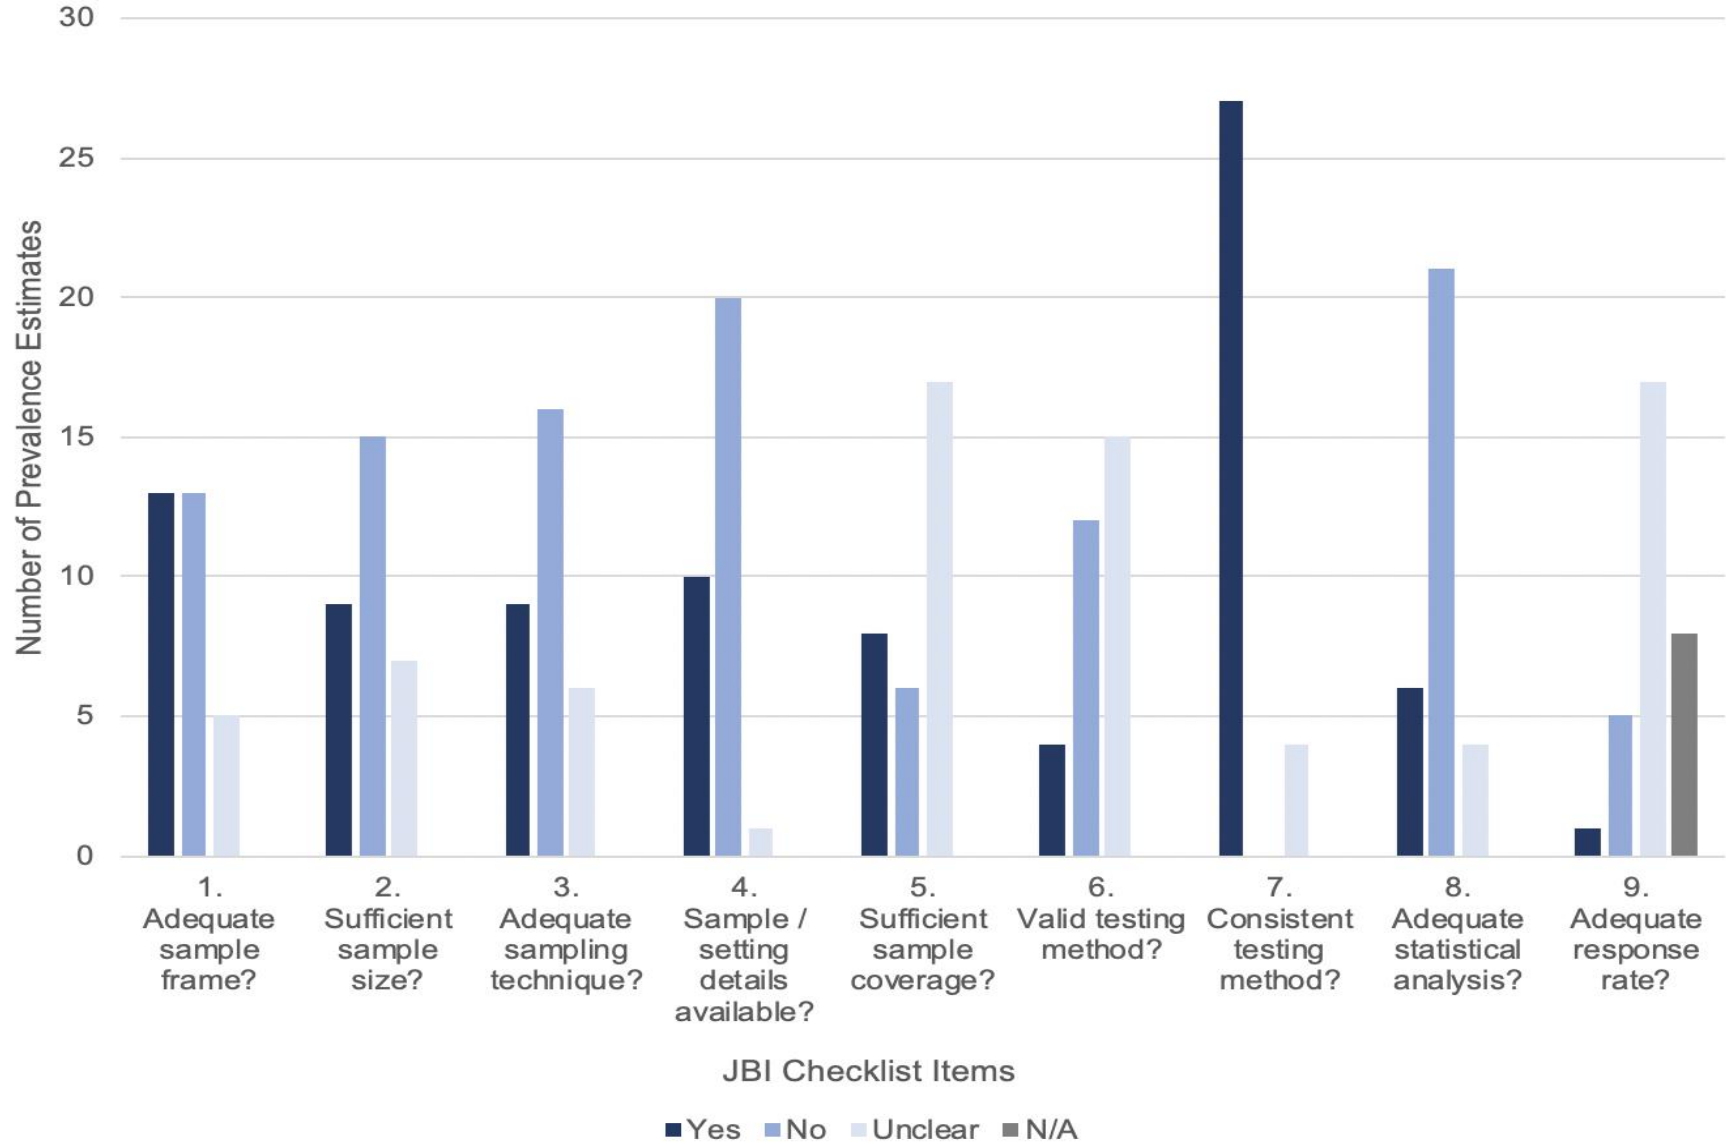

<sup>a</sup>Prevalence estimates were critically appraised per the Joanna Briggs Institute criteria for prevalence estimates (5).
